# Supplementary material for: Identification of Cysteine Protease Inhibitor CST2 as a Potential Biomarker for Colorectal Cancer
Source: PubMed Central journal article supplement (PMC8317524; doi:10.7150/jca.53983), 2021-06-22
Supplement: jcav12p5144s1.pdf [file jcav12p5144s1.pdf]

**Supplementary Table S1. Clinic pathological features of 14 CRC patients**

|                    | Characteristic | n (%)    |
|--------------------|----------------|----------|
| Age                | < 65           | 9 (64)   |
|                    | ≥ 65           | 5 (36)   |
| Gender             | Male           | 8 (57)   |
|                    | Female         | 6 (43)   |
| Tumor location     | Colon          | 14 (100) |
|                    | Rectum         | 0 (0)    |
| Clinical stage     | I+ II          | 11 (79)  |
|                    | III + IV       | 3 (21)   |
| T stage            | T1+T2          | 6 (43)   |
|                    | T3+T4          | 8 (57)   |
| N stage            | N0             | 5 (36)   |
|                    | N1             | 6 (43)   |
|                    | N2             | 3 (21)   |
| M stage            | M0             | 9 (64)   |
|                    | M1             | 5 (36)   |
| Distant metastasis |                | 5 (36)   |
